# Supplementary material for: Nitrogen doping of graphene and its effect on quantum capacitance, and a new insight on the enhanced capacitance of N-doped carbon
Source: Royal Society of Chemistry journal article supplement (doi:10.1039/c2ee23442d), 2012-01-01
Supplement: c2ee23442d.pdf [file c2ee23442d.pdf]

## Supporting Information

### **Nitrogen doping of graphene and its effect on quantum capacitance, and a new insight on the enhanced capacitance of N-doped carbon**

**Li Li Zhang,<sup>a,‡</sup> Xin Zhao,<sup>a,b,‡</sup> Hengxing Ji,<sup>a</sup> Meryl D. Stoller,<sup>a</sup> Linfei Lai,<sup>a</sup> Shanthi Murali,<sup>a</sup> Stephen Mcdonnell,<sup>c</sup> Brandon Cleveger,<sup>a</sup> Robert M. Wallace<sup>c</sup> and Rodney S. Ruoff<sup>a\*</sup>**

<sup>a</sup> Department of Mechanical Engineering and the Materials Science and Engineering Program, The University of Texas at Austin, 1 University Station C2200, Austin, TX 78712

<sup>b</sup> State Key Laboratory for Modification of Chemical Fibers and Polymer Materials, College of Materials Science and Engineering, Donghua University, Shanghai, 201620, P. R. China

<sup>c</sup> Department of Materials Science and Engineering, The University of Texas at Dallas, Richardson, Texas 75083

<sup>‡</sup> These authors contributed equally to this work.

\* Email: r.ruoff@mail.utexas.edu

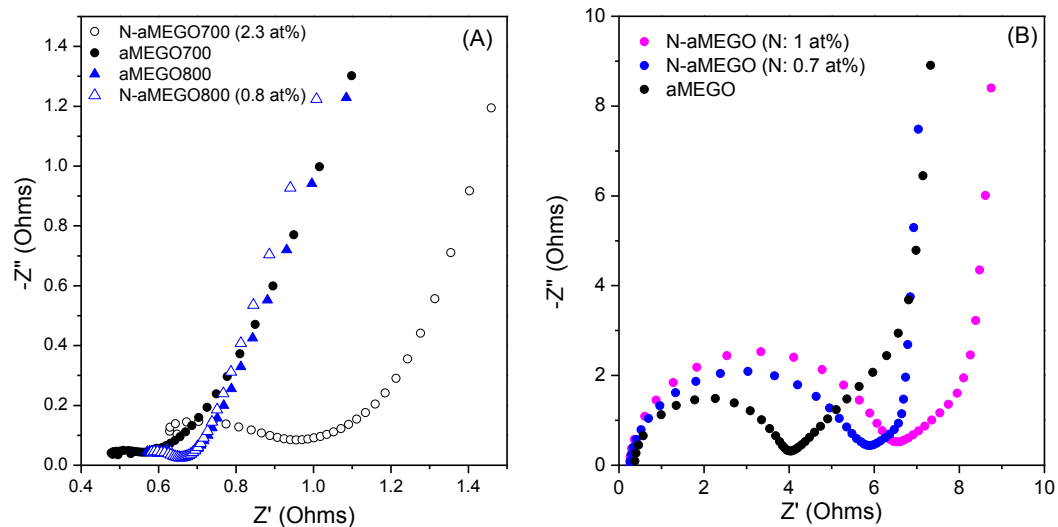

Figure S1. Nyquist plots of complex-plane impedance. (A) Nyquist plots for various aMEGO materials in 6M KOH electrolyte using a three-electrode configuration and (B) in 1M TEABF<sub>4</sub>/AN using a two-electrode configuration.

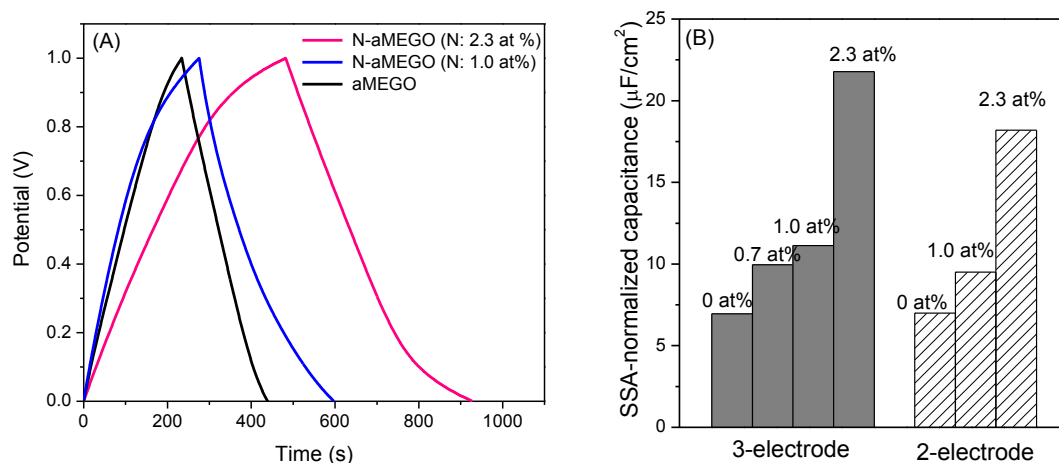

Figure S2. (A) Charge-discharge curves at a current density of 0.2 A/g for N-doped aMEGOs and un-doped aMEGO in 6M KOH electrolyte using a two electrode configuration. (B) The SSA-normalized capacitance at various N concentrations for samples tested in 6M KOH electrolyte using a three-electrode and a two-electrode setup, respectively.

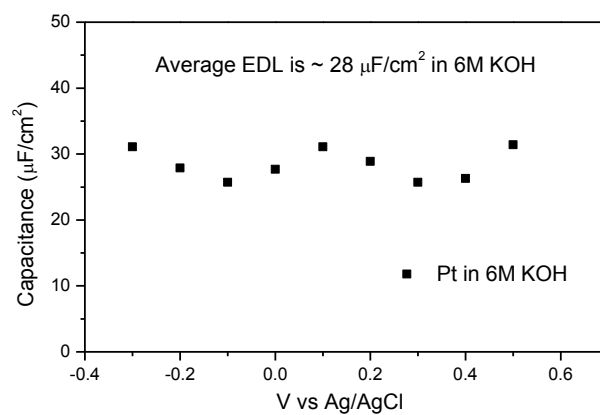

Figure S3. The interfacial capacitance of flat Pt surface measured in 6M KOH electrolyte.

Table S1. Synthesis conditions for pristine graphene and N-doped graphene (NG).

|            | <b>Hydrogen (mTorr)</b> | <b>Methane (mTorr)</b> | <b>Pyridine (mTorr)</b> | <b>Total (mTorr)</b> |
|------------|-------------------------|------------------------|-------------------------|----------------------|
| Pristine-G | 20                      | 50                     | 0                       | 70                   |
| NG1        | 20                      | 35                     | 30                      | 70                   |
| NG2        | 20                      | 0                      | 50                      | 70                   |

Table S2. Properties of various aMEGO and N-doped aMEGOs.

| <b>Samples</b> | <b>Activation Temperature (°C)</b> | <b>BET Surface area (m<sup>2</sup>/g)</b> | <b>N at %</b> |
|----------------|------------------------------------|-------------------------------------------|---------------|
| aMEGO700       | 700                                | 2300                                      | 0             |
| N-aMEGO-1      | 700                                | 2490                                      | 0.7           |
| N-aMEGO-2      | 700                                | 2512                                      | 1             |
| N-aMEGO-3      | 700                                | 1929                                      | 2.3           |
| aMEGO800       | 800                                | 2763                                      | 0             |
| N-aMEGO800     | 800                                | 2226                                      | 0.8           |
